# Supplementary material for: Displacement of basolateral Bazooka/PAR-3 by regulated transport and dispersion during epithelial polarization in Drosophila
Source: PubMed Central journal article supplement — Mol Biol Cell. 2012 Nov 15;23(22):4465–71. doi: 10.1091/mbc.E12-09-0655 (PMC3496619; doi:10.1091/mbc.e12-09-0655), 2012-11-15
Supplement: supp_E12-09-0655v1_CombinedSupMats.pdf [file supp_E12-09-0655v1_CombinedSupMats.pdf]

**Supplementary Table 1. Comparisons of total fluorescent intensities of Baz puncta per cell.**

| Pair wise comparisons                                     | Normalized total puncta fluorescence intensity per cell (mean±SD) | N (embryos) | p value (t-tests) |
|-----------------------------------------------------------|-------------------------------------------------------------------|-------------|-------------------|
| <b>For Fig 1C</b>                                         |                                                                   |             |                   |
| Early Cellularization                                     |                                                                   |             |                   |
| mgv; Baz::GFP                                             | 1.00±0.58                                                         | 5           | <b>0.37*</b>      |
| mgv; BazΔPDZ1-3::GFP                                      | 0.81±0.07                                                         | 5           |                   |
| Mid Cellularization                                       |                                                                   |             |                   |
| mgv; Baz::GFP                                             | 1.00±1.64                                                         | 5           | <b>0.47</b>       |
| mgv; BazΔPDZ1-3::GFP                                      | 0.26±1.80                                                         | 5           |                   |
| Late Cellularization                                      |                                                                   |             |                   |
| mgv; Baz::GFP                                             | 1.00±0.85                                                         | 5           | <b>0.66</b>       |
| mgv; BazΔPDZ1-3::GFP                                      | 0.44±0.54                                                         | 5           |                   |
| <b>For Fig 4E-F</b>                                       |                                                                   |             |                   |
| Gastrulation (stage 7-8)                                  |                                                                   |             |                   |
| Endogenous Baz in WT (G)                                  | 1.00±0.74                                                         | 10          | <b>0.84</b>       |
| Endogenous Baz in mgv; <i>par-1</i> shRNA Valium22        | 1.08±0.74                                                         | 10          |                   |
| Gastrulation (stage 7-8)                                  |                                                                   |             |                   |
| mgv; Baz::GFP (G) attp40                                  | 1.00±0.89                                                         | 5           | <b>0.68</b>       |
| mgv; Baz::GFP; <i>par-1</i> shRNA Valium 22               | 1.18±0.36                                                         | 5           |                   |
| <b>For Fig 4H</b>                                         |                                                                   |             |                   |
| Gastrulation (stage 7-8)                                  |                                                                   |             |                   |
| mgv; Baz ::GFP                                            | 1.00±0.49                                                         | 5           | <b>0.99</b>       |
| mgv; BazΔPDZ1-3::GFP                                      | 0.99±0.51                                                         | 5           |                   |
| mgv; Baz <sup>S151A</sup> <sup>S1085A</sup> ::GFP         | 0.78±0.89                                                         | 5           | <b>0.39</b>       |
| mgv; Baz <sup>S151A</sup> ΔPDZ1-3 <sup>S1085A</sup> ::GFP | 1.14±0.28                                                         | 5           | <b>0.29</b>       |

\*each comparison based on quantifications of puncta selected with the same settings within each experiment

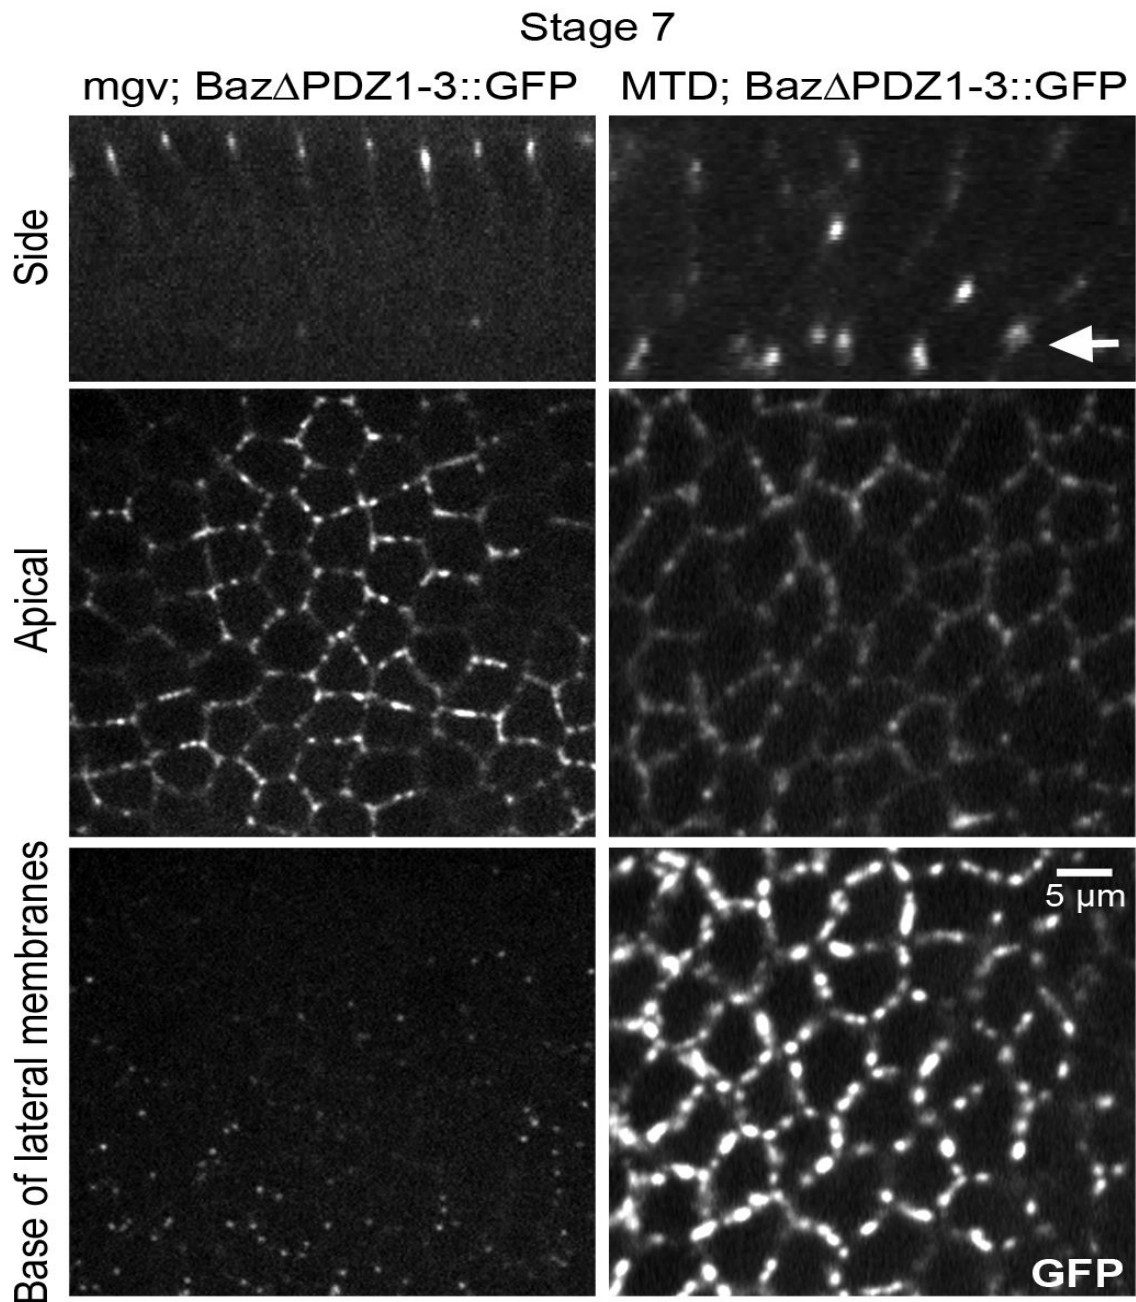

### McKinley and Harris Supplementary Figure 1

Supplementary Figure 1. **Excessive overexpression of Baz $\Delta$ PDZ1-3::GFP leads to basal mislocalization at gastrulation.** Stage 7 embryos fixed and imaged for GFP. Baz $\Delta$ PDZ1-3::GFP expressed maternally with mgv is primarily localized around the apicolateral domain. Baz $\Delta$ PDZ1-3::GFP expressed maternally with the stronger MTD is primarily localized the basal end of lateral membranes (arrow).
